# Supplementary material for: Hierarchical heterostructures based on prickly Ni nanowires/Cu2O nanoparticles with enhanced photocatalytic activity
Source: Royal Society of Chemistry journal article supplement (doi:10.1039/c5dt04484g), 2016-01-01
Supplement: c5dt04484g1.pdf [file c5dt04484g1.pdf]

## Supporting Information

### Hierarchical Heterostructures based on Prickly Ni Nanowires/ $\text{Cu}_2\text{O}$ Nanoparticles with Enhanced Photocatalytic Activity

Xiaolin Li, Yujie Ma, Zhi Yang\*, Shusheng Xu, Liangming Wei, Da Huang, Tao Wang, Nantao Hu\*, Yafei Zhang\*

Key Laboratory for Thin Film and Microfabrication of Ministry of Education, Department of Micro/Nano Electronics, School of Electronic Information and Electrical Engineering, Shanghai Jiao Tong University, Shanghai 200240, P. R. China.

\* Corresponding author. E-mail: zhiyang@sjtu.edu.cn, hunantao@sjtu.edu.cn, yfzhang@sjtu.edu.cn

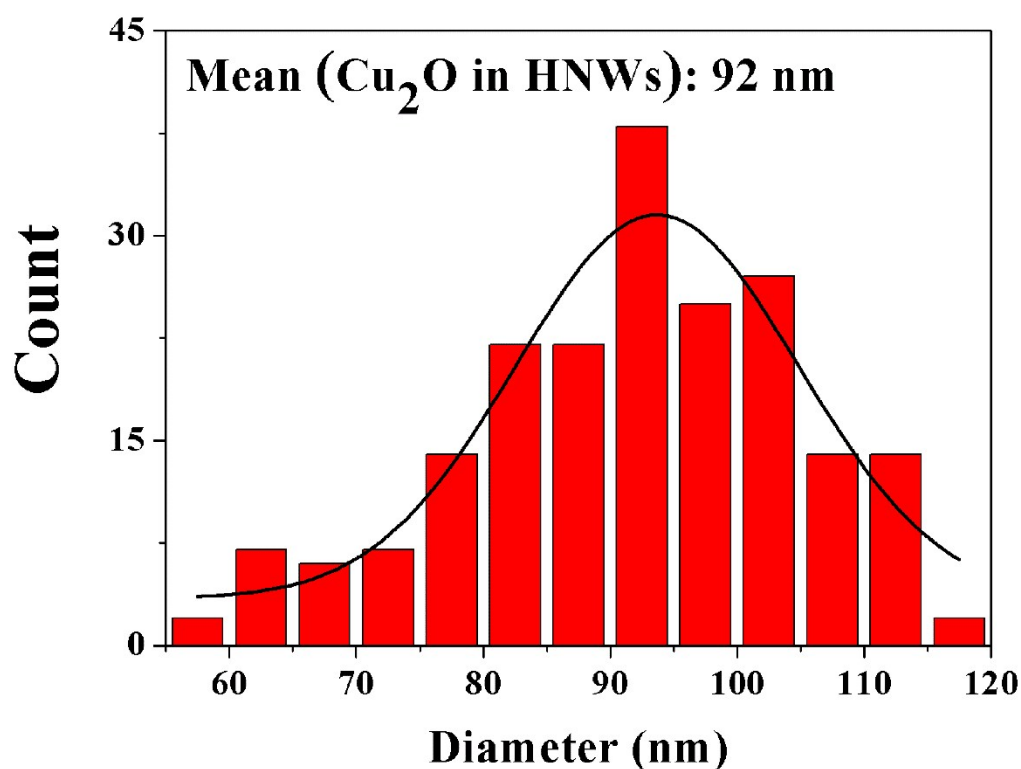

Fig. S1 The size distribution of  $\text{Cu}_2\text{O}$  nanoparticles in HNWs.

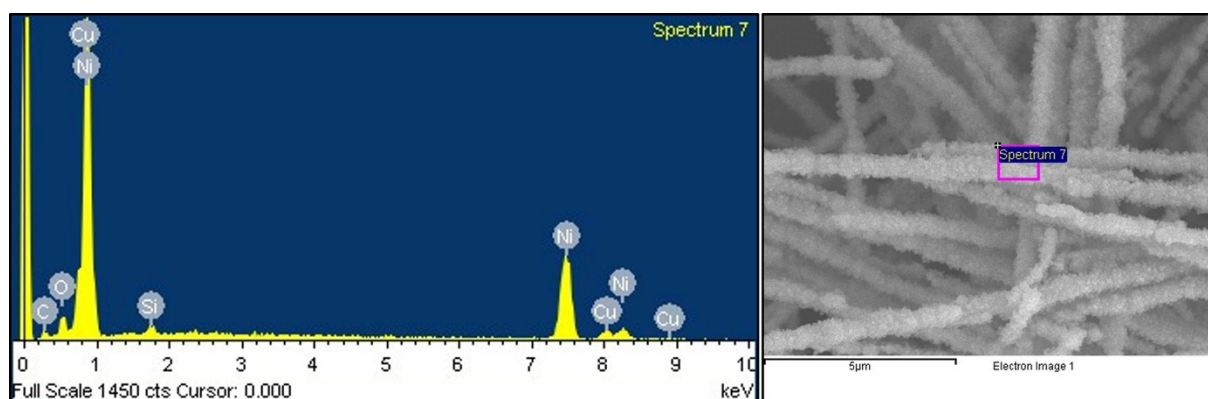

**Fig. S2** EDX spectrum of as-synthesized Ni-Cu<sub>2</sub>O HNWs.

**Table S1.** Cu element and Cu<sub>2</sub>O content (wt%) in heteronanowires

| Sample Weight <sup>a)</sup> | Cu content <sup>b)</sup> | Cu <sub>2</sub> O content |
|-----------------------------|--------------------------|---------------------------|
| Sample 1: 12.5 mg           | 10                       | 11.52                     |
| Sample 2: 32.0 mg           | 10.5                     | 11.81                     |
| Sample 3: 23.1 mg           | 12.3                     | 13.84                     |

a) Sample tested was prepared with different batches of Ni NWs. b) The Ni-Cu<sub>2</sub>O HNWs was dissolved in aqua regia, and the content of Cu element was analysed by ICP.

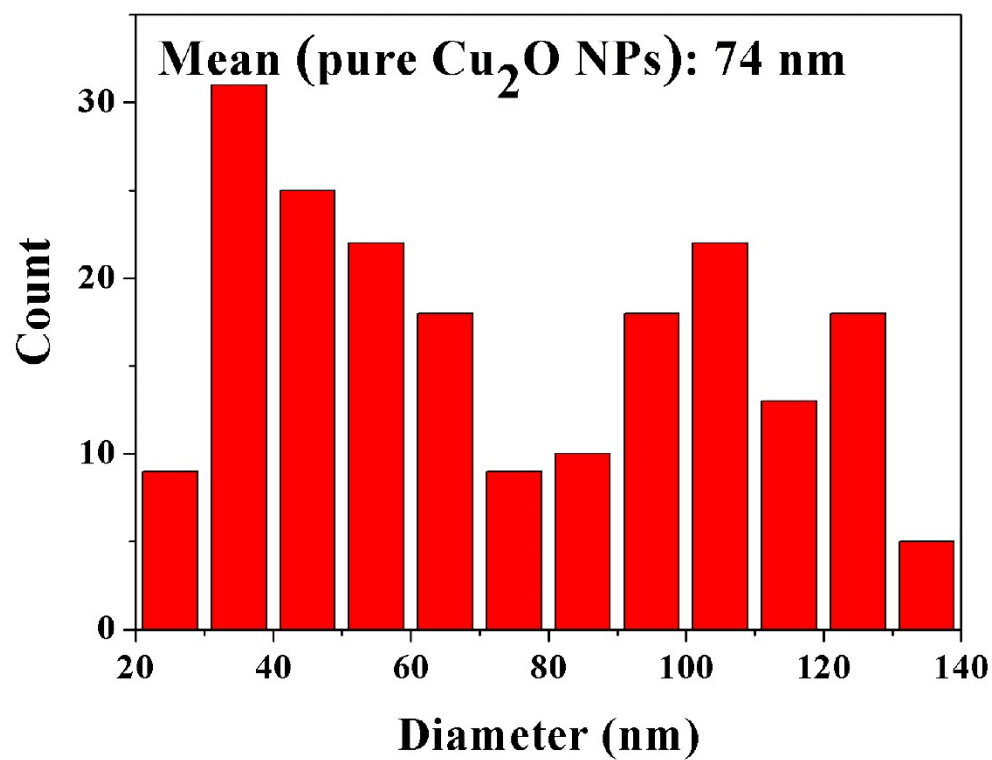

Fig. S3 The size distribution of pure Cu<sub>2</sub>O NPs.

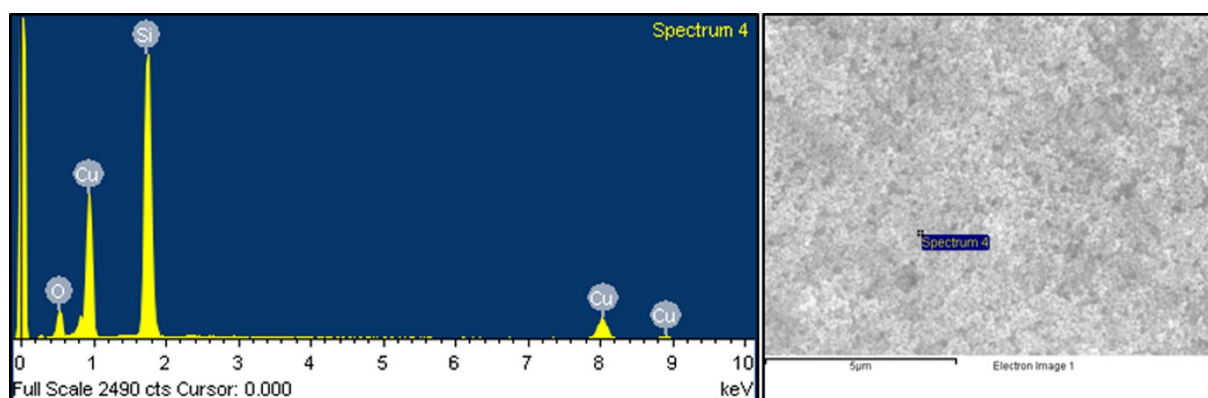

Fig. S4 EDX spectrum of pure Cu<sub>2</sub>O NPs.

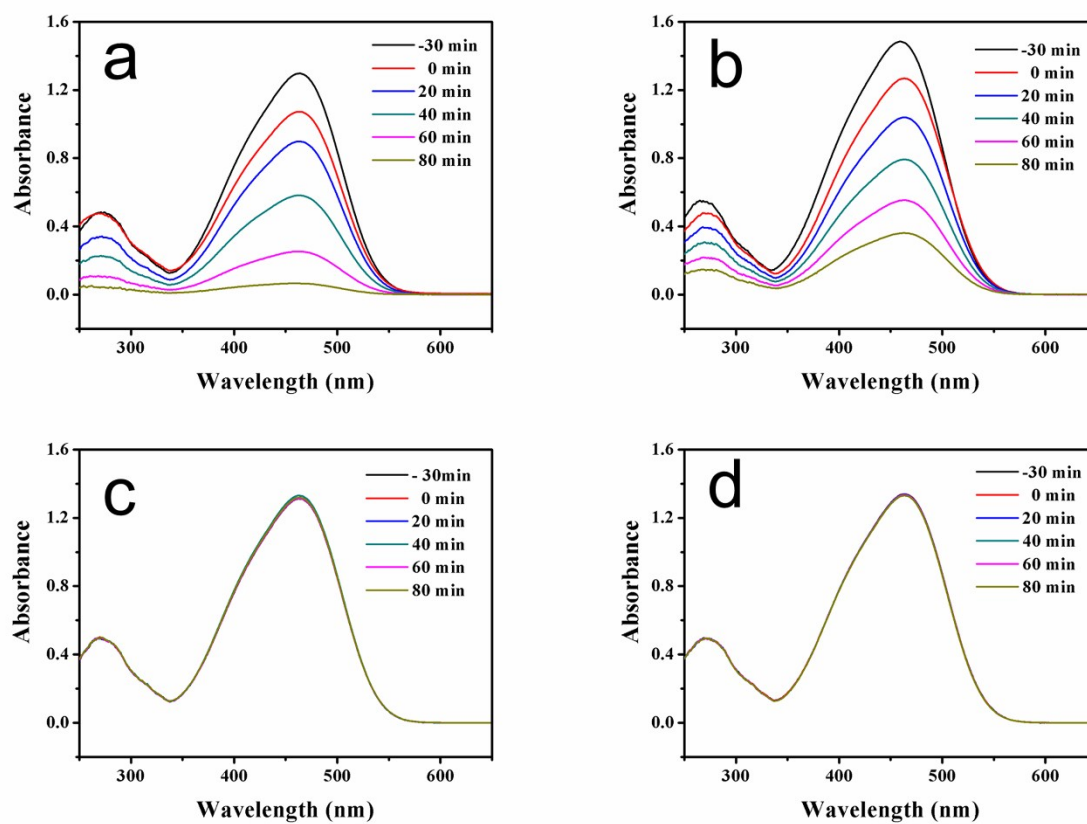

**Fig. S5** Variation in the absorption of the MO solution in the presence of the as-prepared photocatalysts for different irradiation times: (a) Ni-Cu<sub>2</sub>O HNWs, (b) Cu<sub>2</sub>O NPs, (c) Ni NWs, and (d) blank.

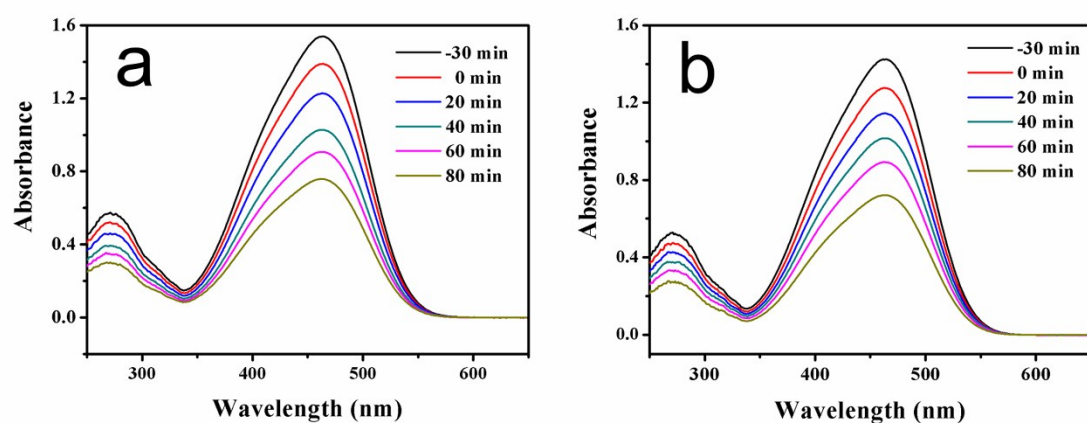

**Fig. S6** The adsorption curves of MO in the presence of the as-prepared photocatalysts under dark for different times: (a) Ni-Cu<sub>2</sub>O HNWs and (b) Cu<sub>2</sub>O NPs.

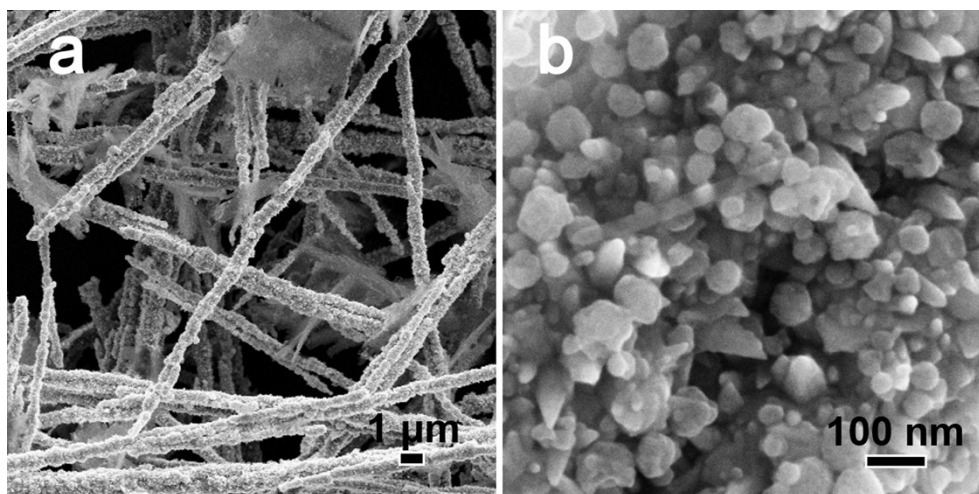

Fig. S7 The (a) low and (b) high magnification SEM image of Ni-Cu<sub>2</sub>O HNWs after photocatalytic test.

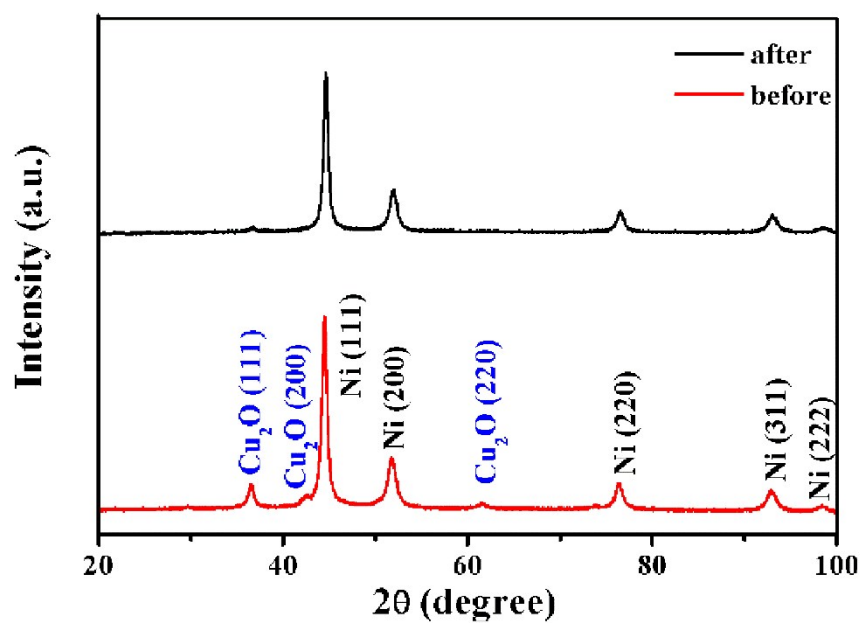

Fig. S8 XRD patterns of the Ni-Cu<sub>2</sub>O HNWs before and after photocatalytic test.

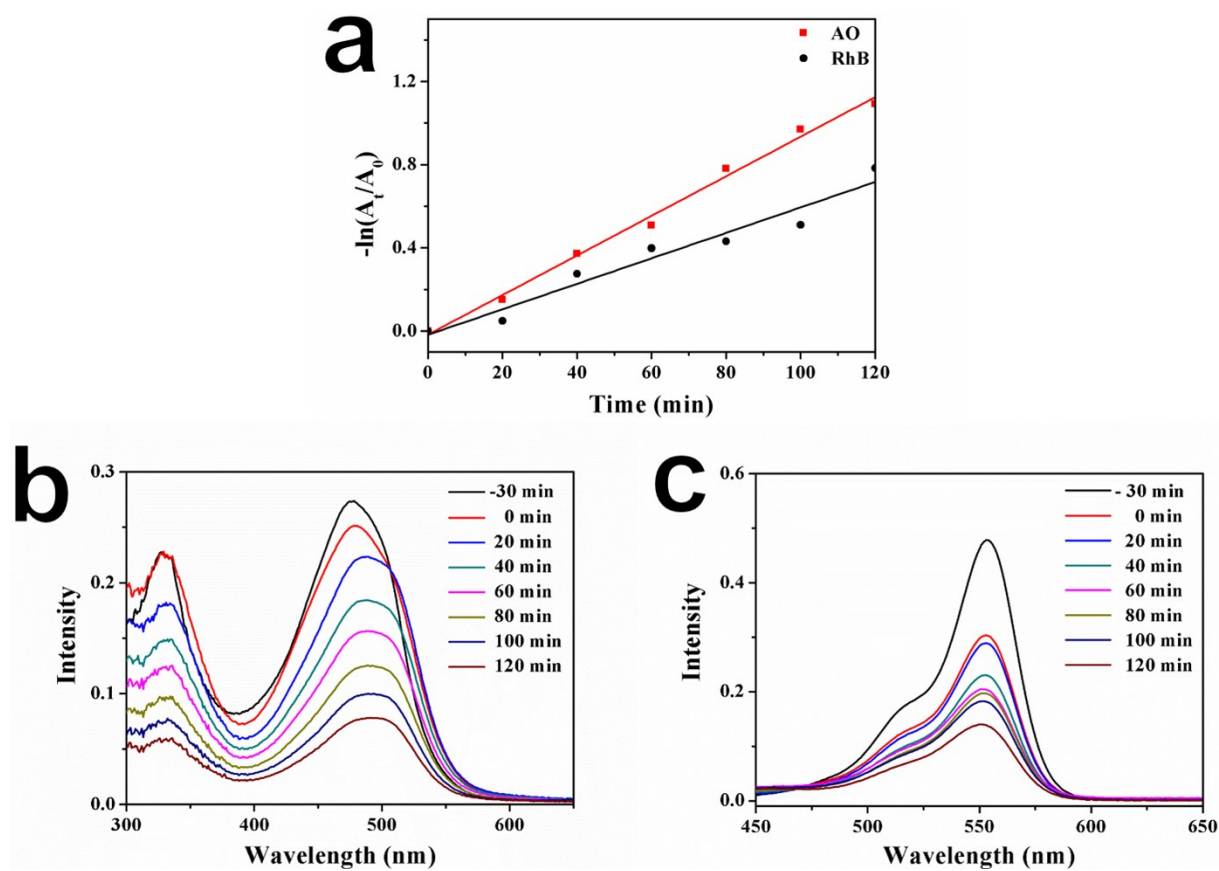

**Fig. S9** (a) Plots of  $-\ln(A_t/A_0)$  versus time for rate constant calculation of OG and RhB photodegraded by Ni-Cu<sub>2</sub>O HNWs. Time-dependent UV-Vis spectra of (b) OG, and (c) RhB solution photodegraded by Ni-Cu<sub>2</sub>O HNWs.

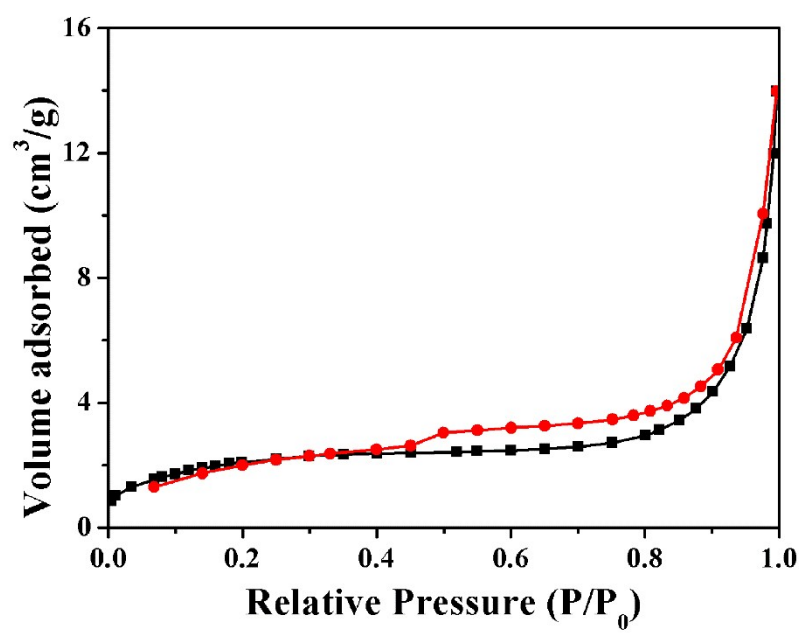

**Fig. S10** N<sub>2</sub> adsorption–desorption BET isotherms of Ni-Cu<sub>2</sub>O HNWs.
